# Supplementary material for: Magnetic field effects on photodecomposition of methylene blue over ZnO particles
Source: Royal Society of Chemistry journal article supplement (doi:10.1039/c1ra00051a), 2011-01-01
Supplement: c1ra00051a.pdf [file c1ra00051a.pdf]

### Supplementary I: UV-vis spectra

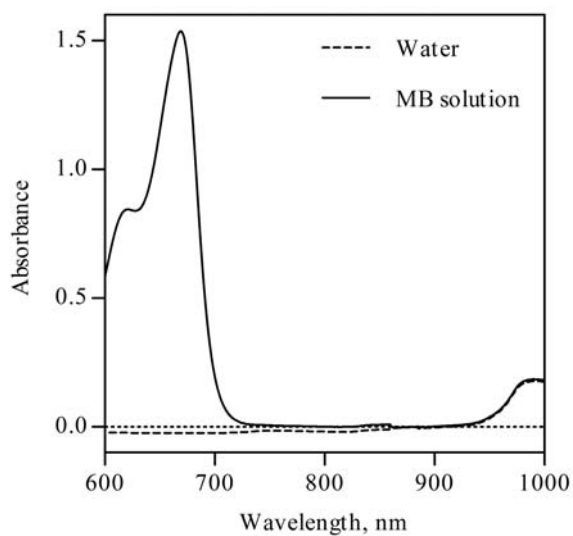

Figure S1: The UV-vis spectra of the absorbance of methylene blue

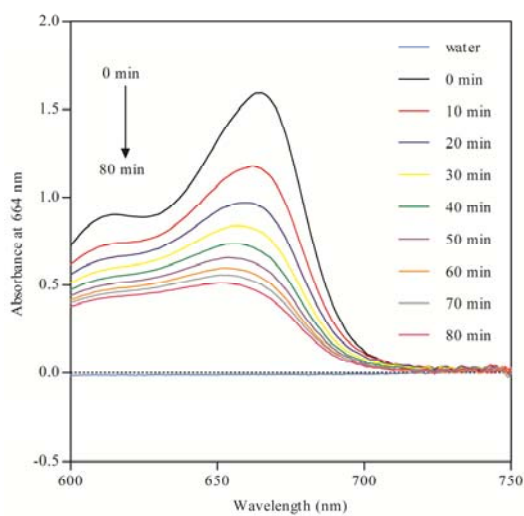

Figure S2: An example of original UV-Vis spectra of monitoring MB concentration after irradiation with UV light for 80 min.

### Supplementary II: Temperature calibration

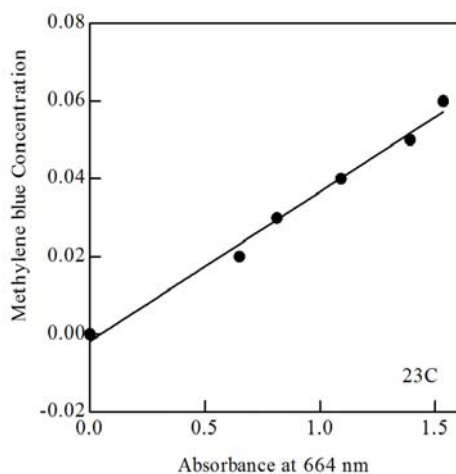

Figure S3: Relationship between the concentration of MB solution and the absorbance at 664 nm at 23°C.

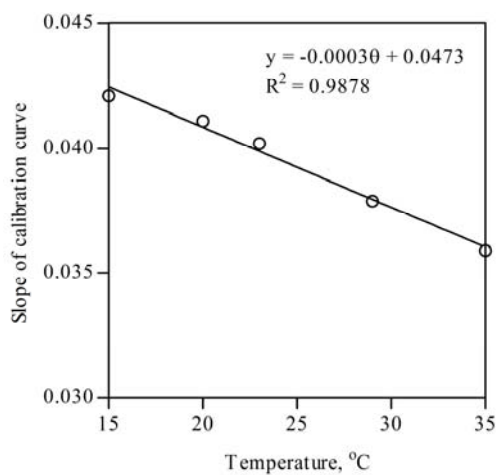

Figure S4: Relationship between slope of calibration curve and temperature.
